# Supplementary material
Source: Royal Society of Chemistry journal article supplement (doi:10.1039/d5tc03831f)
Supplement: d5tc03831f1.pdf [file d5tc03831f1.pdf]

## Supplemental Information

### **Organic electrochemical transistor-based biosensors using doped polyaniline**

Ryotaro Kawamura, Waner He\*, Atsushi Isobe, Haoqin Zhang, Nanase Ikeda, Yuhei Hayamizu,  
and Tsuyoshi Michinobu\*

Department of Materials Science and Engineering, Institute of Science Tokyo, 2-12-1  
Ookayama, Meguro-ku, Tokyo 152-8552, Japan

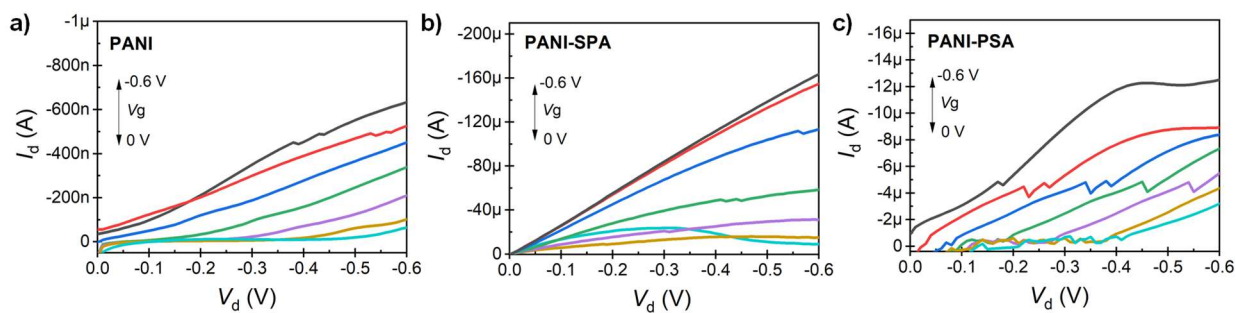

**Fig. S1** Output characteristics of OEETs based on a) **PANI**, b) **PANI-SPA**, and c) **PANI-PSA**.

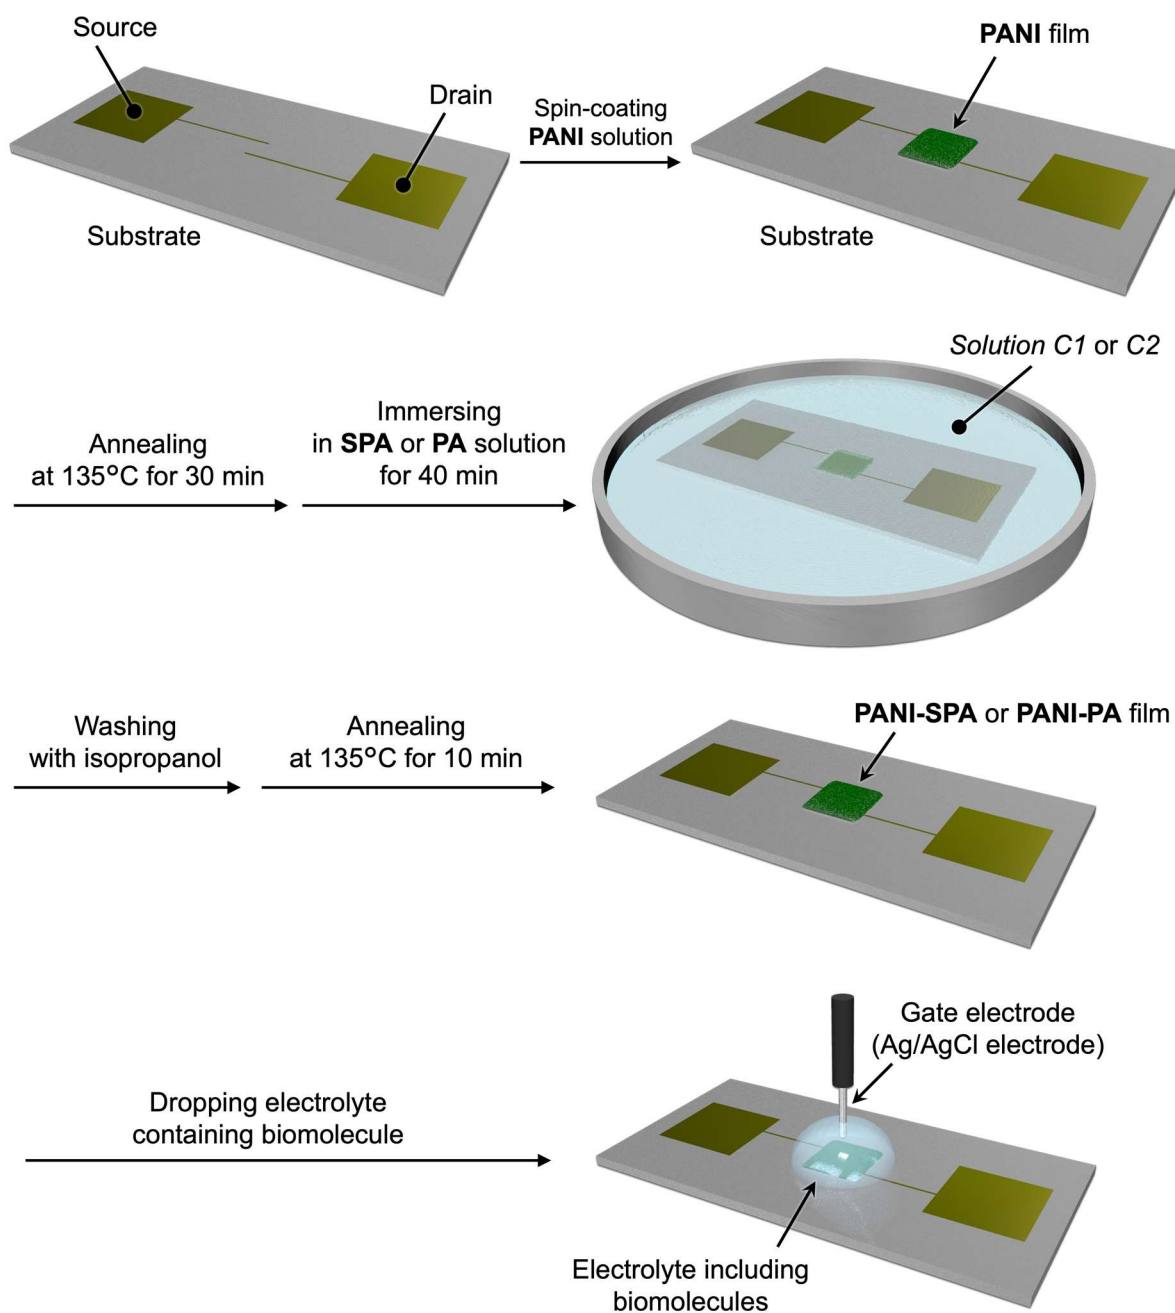

**Fig. S2** The detailed fabrication process of **PANI** film and the OEET device in this study.

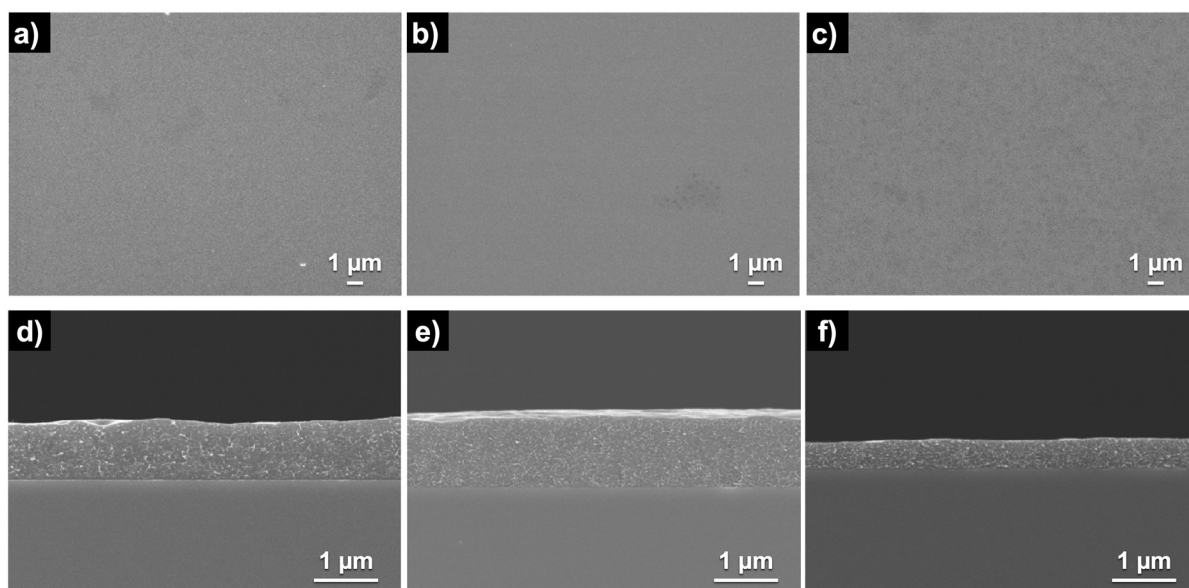

**Fig. S3** SEM images of the polymer film surface and cross-section for a,d) PANI, b,e) PANI-SPA, and c,f) PANI-PSA.

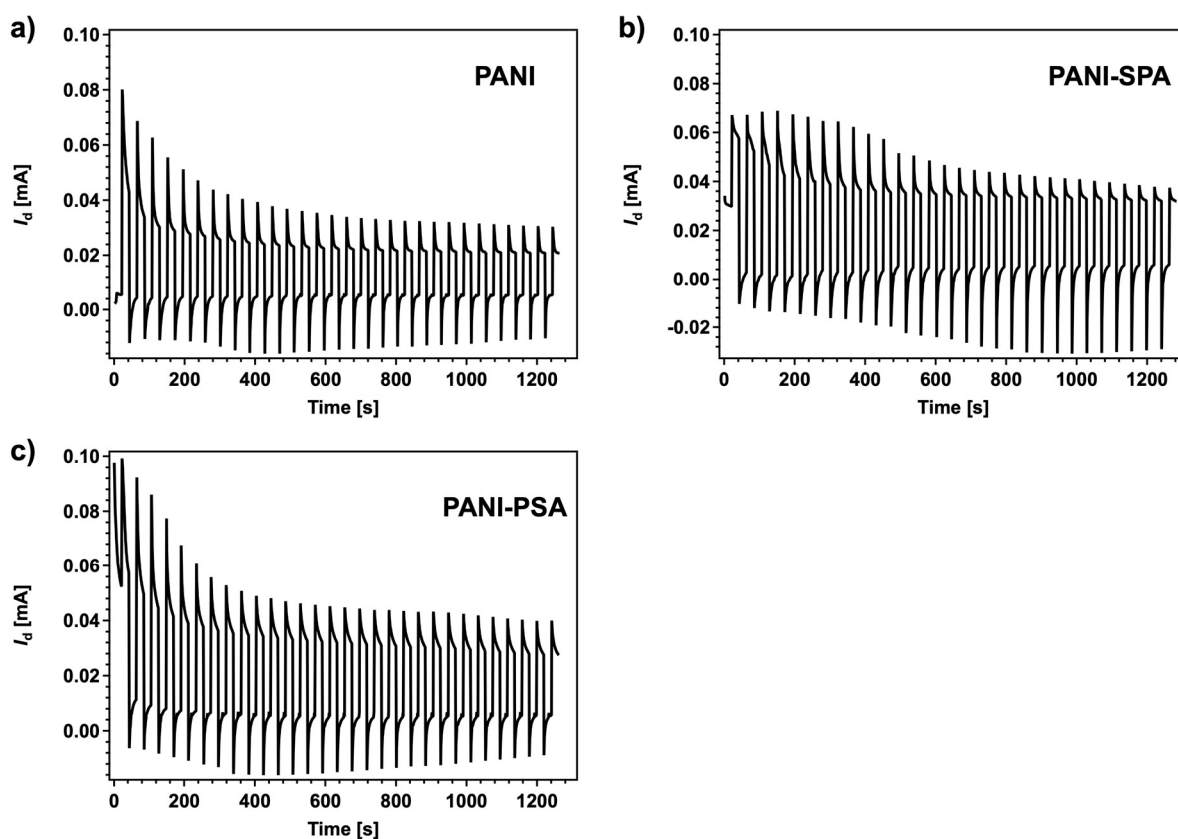

**Fig. S4** Real-time drain current switching profiles under repeated on/off gate voltage cycles (0.5 V / 0 V) for a) PANI, b) PANI-SPA, and c) PANI-PSA. Measurements were performed under ambient conditions with a fixed drain voltage of  $-0.6$  V. Each gate voltage cycle lasted 40 s (20 s on / 20 s off) and was repeated for a total duration of 1200 s.

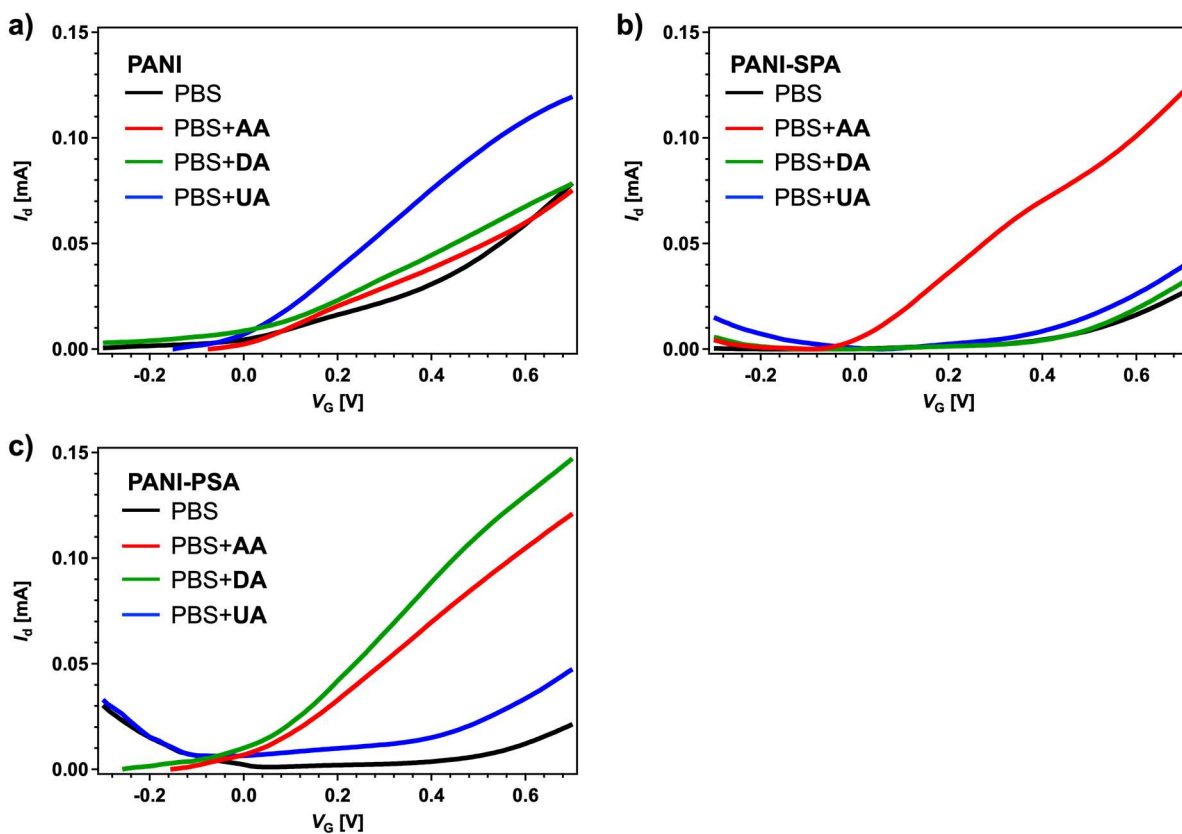

**Fig. S5** Transfer curves of a) PANI, b) PANI-SPA, and c) PANI-PSA measured with/without biomolecules in 0.1 M phosphate-buffered saline (PBS, pH 7.0). The drain voltage was set to  $-0.6$  V, and the gate voltage was swept from  $-0.3$  V to  $0.7$  V.

**Table S1** Maximum transconductance ( $g_{m,max}$ ) and threshold voltage obtained from the transfer curves (Figure 5) in OECTs at a biomolecule concentration of  $1 \text{ mM}^a$

| Channel materials | Electrolytes | $g_{m,max}$ (mS) | Gate voltage at $g_{m,max}$ (V) | Threshold voltage (V) |
|-------------------|--------------|------------------|---------------------------------|-----------------------|
| PANi              | PBS          | -                | -                               | 0.10                  |
|                   | PBS + AA     | 0.10             | 0.12                            | 0.09                  |
|                   | PBS + UA     | 0.19             | 0.32                            | 0.02                  |
|                   | PBS + DA     | 0.11             | 0.25                            | 0.10                  |
| PANi-SPA          | PBS          | -                | -                               | 0.48                  |
|                   | PBS + AA     | 0.19             | 0.13                            | $-0.12$               |
|                   | PBS + UA     | 0.15             | 0.71                            | 0.31                  |
|                   | PBS + DA     | 0.13             | 0.66                            | 0.49                  |
| PANi-PSA          | PBS          | -                | -                               | 0.57                  |
|                   | PBS + AA     | 0.19             | 0.35                            | 0.03                  |
|                   | PBS + UA     | 0.15             | 0.65                            | 0.20                  |
|                   | PBS + DA     | 0.24             | 0.34                            | $-0.01$               |

<sup>a</sup> Since the values in the table are averaged, there may be slight differences compared with those shown in Figure 5.

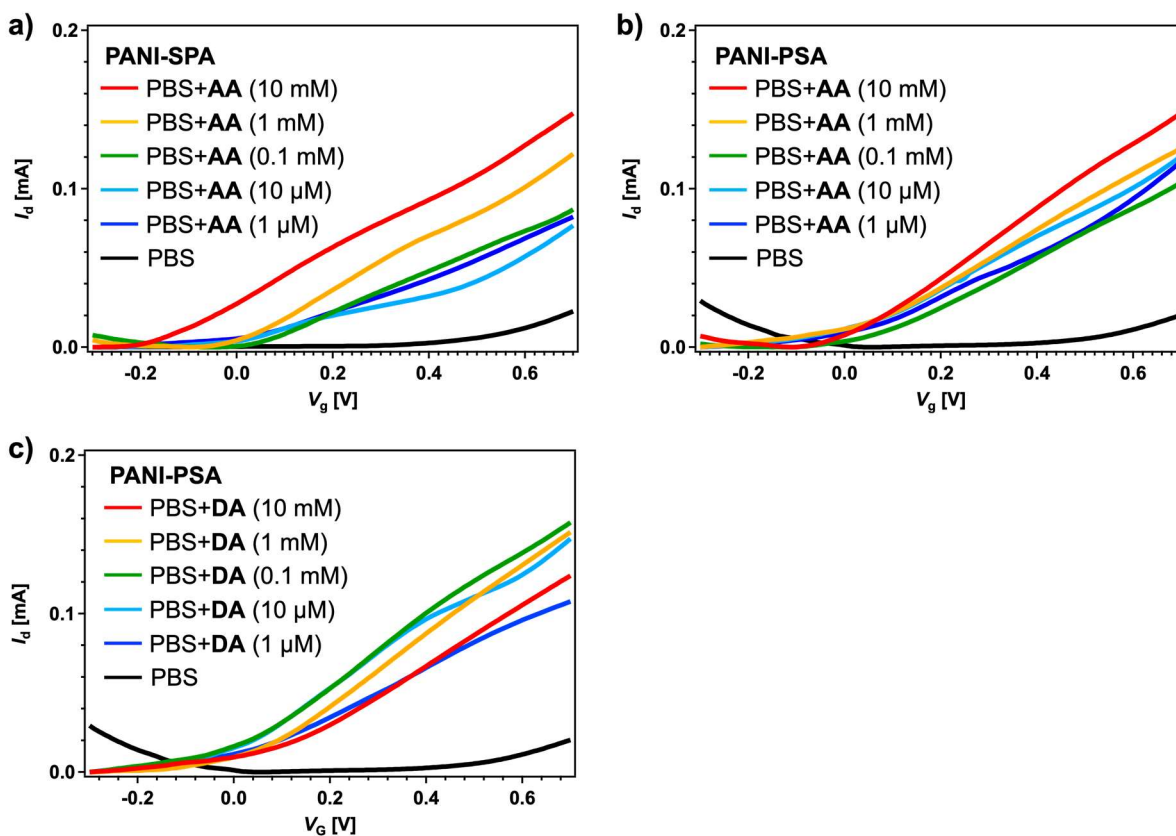

**Fig. S6** Transfer curves of a) PANI-SPA with varying AA concentrations, and b,c) PANI-PSA with varying b) AA and c) DA concentrations. The AA or DA concentrations were 0 M, 1  $\mu$ M, 10  $\mu$ M, 0.1 mM, 1 mM, and 10 mM in 0.1 M PBS. Measurements were performed with a drain voltage of  $-0.6$  V and a gate voltage sweep from  $-0.3$  V to  $0.7$  V, demonstrating concentration-dependent modulation of channel conductivity.

**Table S2** Maximum transconductance ( $g_{m,max}$ ) and threshold voltage extracted from the transfer curves (Figure 6) in OEECTs<sup>a</sup>

| <b>Channel materials</b> | <b>Electrolytes</b>    | <b><math>g_{m,max}</math> (mS)</b> | <b>Gate voltage at <math>g_{m,max}</math> (V)</b> | <b>Threshold voltage (V)</b> |
|--------------------------|------------------------|------------------------------------|---------------------------------------------------|------------------------------|
| <b>PANI-SPA</b>          | PBS                    | -                                  | -                                                 | 0.48                         |
|                          | PBS + AA (1 $\mu$ M)   | 0.11                               | 0.14                                              | -0.01                        |
|                          | PBS + AA (10 $\mu$ M)  | 0.10                               | 0.08                                              | 0.03                         |
|                          | PBS + AA (100 $\mu$ M) | 0.15                               | 0.15                                              | -0.04                        |
|                          | PBS + AA (1 mM)        | 0.19                               | 0.13                                              | -0.12                        |
|                          | PBS + AA (10 mM)       | 0.19                               | 0.08                                              | -0.26                        |
| <b>PANI-PSA</b>          | PBS                    | -                                  | -                                                 | 0.57                         |
|                          | PBS + AA (1 $\mu$ M)   | 0.16                               | 0.17                                              | 0.02                         |
|                          | PBS + AA (10 $\mu$ M)  | 0.18                               | 0.19                                              | 0.03                         |
|                          | PBS + AA (100 $\mu$ M) | 0.17                               | 0.36                                              | 0.05                         |
|                          | PBS + AA (1 mM)        | 0.19                               | 0.35                                              | 0.03                         |
|                          | PBS + AA (10 mM)       | 0.23                               | 0.27                                              | -0.11                        |
| <b>PANI-PSA</b>          | PBS                    | -                                  | -                                                 | 0.57                         |
|                          | PBS + DA (1 $\mu$ M)   | 0.17                               | 0.35                                              | -0.03                        |
|                          | PBS + DA (10 $\mu$ M)  | 0.24                               | 0.26                                              | 0.01                         |
|                          | PBS + DA (100 $\mu$ M) | 0.25                               | 0.26                                              | 0.02                         |
|                          | PBS + DA (1 mM)        | 0.24                               | 0.29                                              | -0.01                        |
|                          | PBS + DA (10 mM)       | 0.20                               | 0.37                                              | 0.03                         |

<sup>a</sup> Since the values in the table are averaged, there may be slight differences compared with those shown in Figure 6.

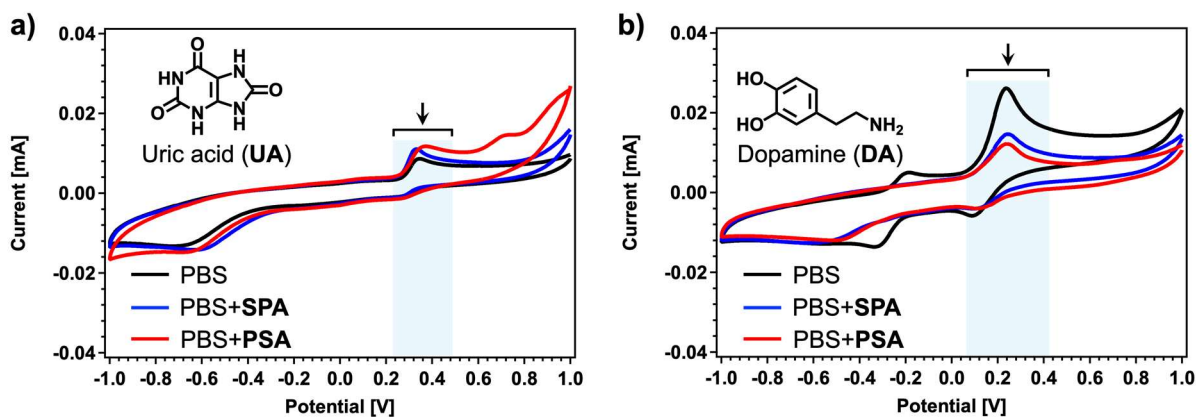

**Fig. S7** Cyclic voltammograms of electrolytes containing a) 1 mM UA and b) 1 mM DA, measured in PBS (black), PBS + SPA (blue), and PBS + PSA (red). Conditions: scanning range  $-1.0$  to  $1.0$  V, scan rate  $50 \text{ mV s}^{-1}$ . The cyclic voltammograms correspond to the second cycle after stabilization during the first scan.

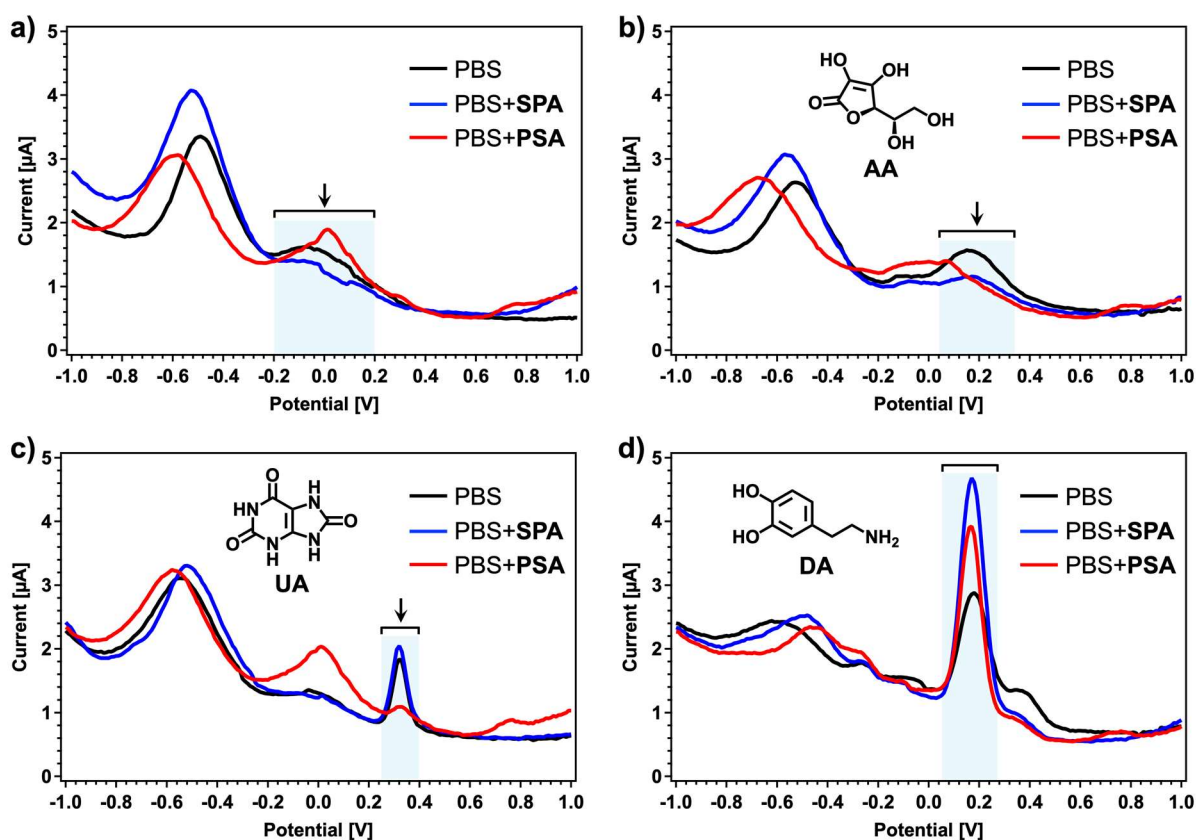

**Fig. S8** Differential pulse voltammograms of electrolytes containing a) only PBS, b) AA (1 mM), c) UA (1 mM), and d) DA (1 mM) in PBS (black), PBS + SPA (blue), and PBS + PSA (red). Measurements were carried out over the potential range  $-1.0$  to  $1.0$  V with a step potential of  $10 \text{ mV s}^{-1}$ , amplitude  $0.025 \text{ V}$ , pulse width  $0.06 \text{ ms}$ , and pulse interval  $0.5 \text{ s}$ .

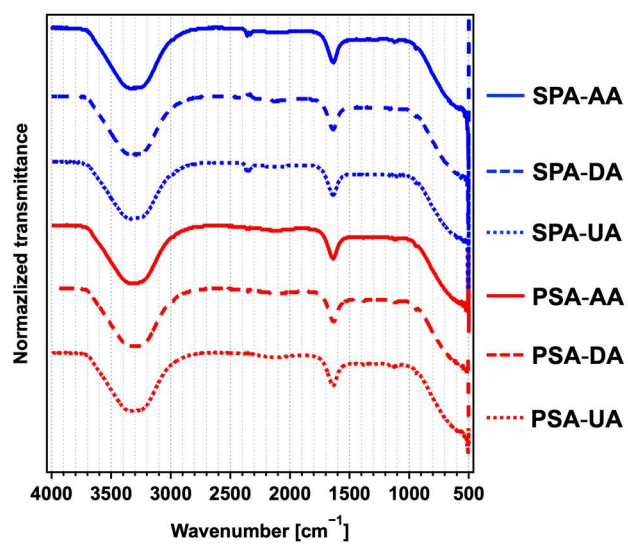

**Fig. S9** Full FT-IR spectra of biomolecule-sulfonic acid mixtures in deionized water.

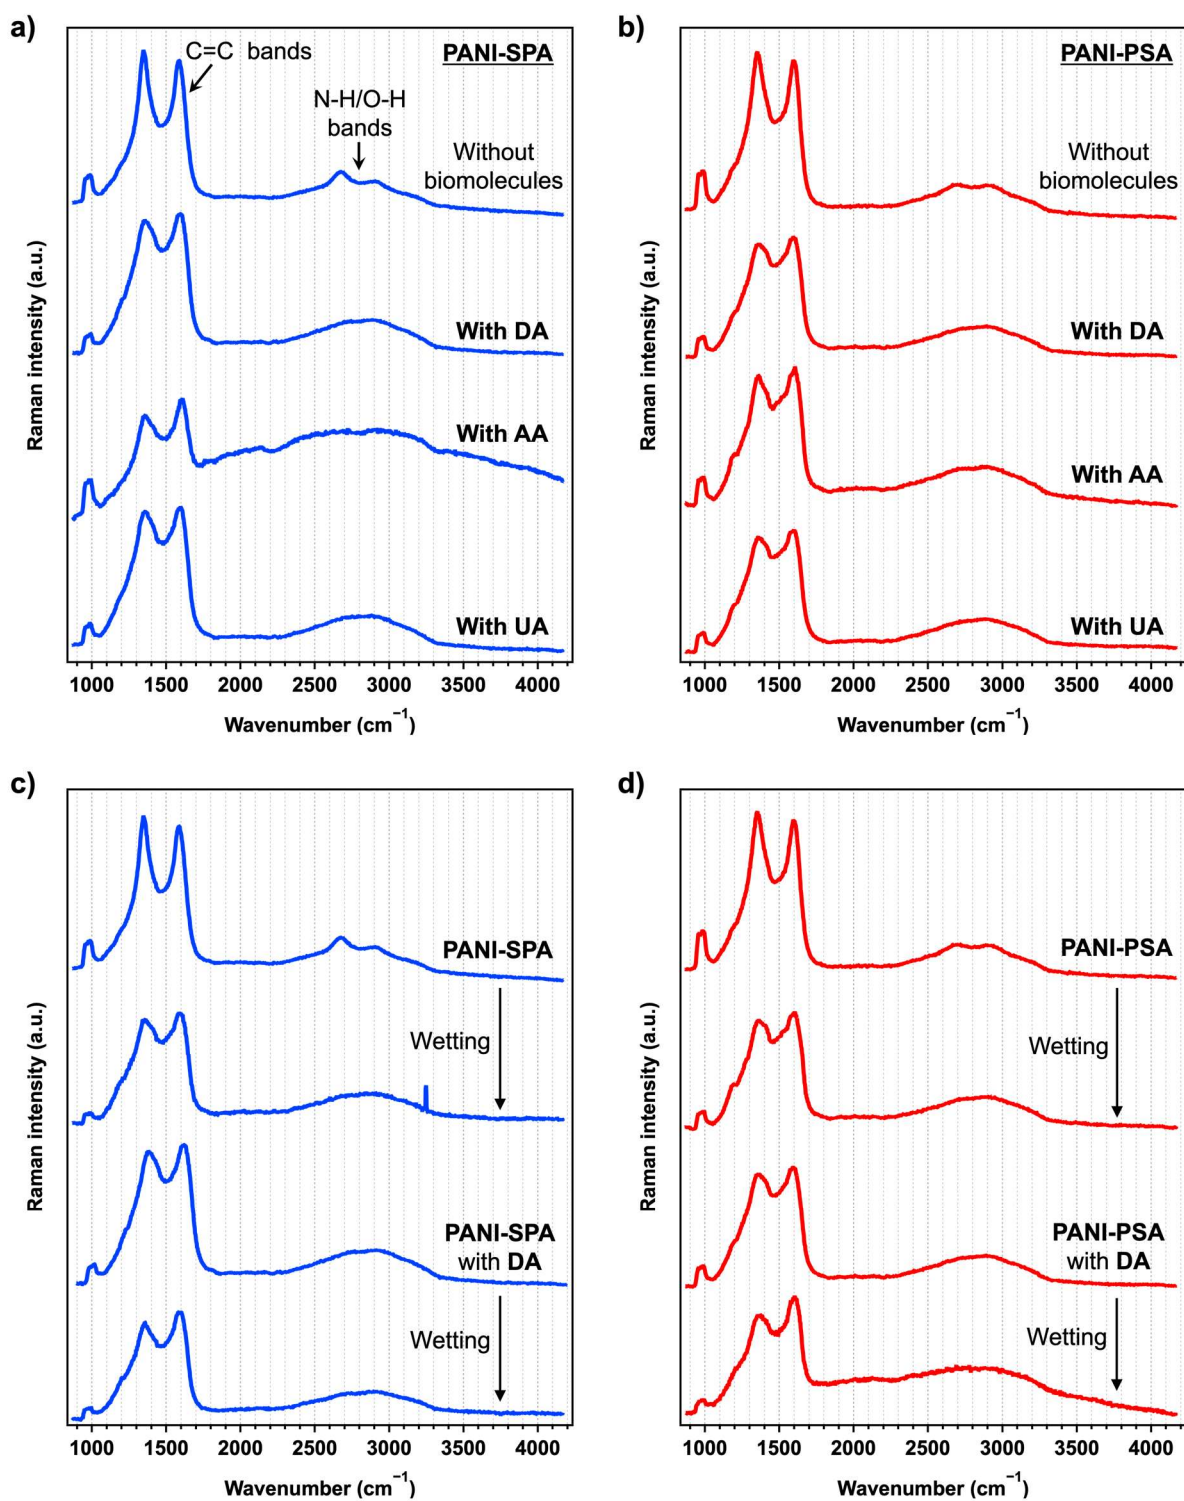

**Fig. S10** Raman spectra of (a,c) PANI-SPA and (b,d) PANI-PSA. The measured films with biomolecules were prepared by dropping them into the aqueous solution followed by annealing at 130 °C for 5 min. For the spectra shown in (c) and (d), films were wetted by exposing them to water vapor. The excitation laser wavelength was 532 nm.
